# Supplementary material for: Home-based or remote exercise testing in chronic respiratory disease, during the COVID-19 pandemic and beyond: A rapid review
Source: PubMed Central journal article supplement — Chron Respir Dis. 2020 Aug 25;17:1479973120952418. doi: 10.1177/1479973120952418 (PMC7450293; doi:10.1177/1479973120952418), 2020-08-25
Supplement: Supplement_19June.pdf [file Supplement_19June.pdf]

Table S1. Search strategy for MEDLINE.

1. Lung Diseases/
2. Lung Diseases, Obstructive/
3. Lung Diseases, Interstitial
4. exp Pulmonary Fibrosis
5. exp Cystic Fibrosis
6. exp Asthma
7. exp Bronchiectasis
8. Hypertension Pulmonary/
9. 1 or 2 or 3 or 4 or 5 or 6 or 7 or 8
10. exp Exercise Test
11. Walking Test/
12. step NEAR/2 test
13. sit NEAR/2 stand
14. gait near/2 stand
15. 10 or 11 or 12 or 13 or 14
16. 9 and 15
17. Limit 16 to English language

Table S2. Included studies for 6-minute walk test

| Study                     | Exercise test | Study design      | Number of participants (n) | Diagnosis            | Severity<br>FEV <sub>1</sub> % predicted<br>mean (SD) | Location of test     | Monitoring                                                              |
|---------------------------|---------------|-------------------|----------------------------|----------------------|-------------------------------------------------------|----------------------|-------------------------------------------------------------------------|
| Brooks 2003 <sup>1</sup>  | 6MWT          | RXT               | 18                         | COPD                 | 42 (8)                                                | Outdoors vs hospital | SpO <sub>2</sub> , pulse, dyspnoea, fatigue                             |
| Holland 2015 <sup>2</sup> | 6MWT          | RXT               | 19                         | COPD                 | 54 (19)                                               | Home vs hospital     | SpO <sub>2</sub> , pulse, blood pressure, dyspnoea, fatigue             |
| Juen 2014 <sup>3</sup>    | 6MWT          | Validation        | 30                         | Asthma, COPD or both | 68 (23)                                               | Centre / remote      | SpO <sub>2</sub> , pulse, distance (remote via app)                     |
| Juen 2015 <sup>4</sup>    | 6MWT          | Validation        | 28                         | COPD                 | NS                                                    | Centre / remote      | SpO <sub>2</sub> , pulse, distance (remote via app)                     |
| Zainuldin <sup>5</sup>    | 6MWT          | Repeated measures | 39                         | COPD                 | 58 (19)                                               | Centre               | SpO <sub>2</sub> , pulse, dyspnoea, fatigue, cardiometabolic parameters |

COPD – chronic obstructive pulmonary disease, FEV<sub>1</sub> – forced expiratory volume in 1 second, NS – not stated, RXT – randomised crossover trial, SpO<sub>2</sub> – oxyhaemoglobin saturation.

Table 3. Included studies for sit-to-stand tests

| Study                           | Exercise test           | Study design                            | Number of participants (n) | Diagnosis                       | Disease severity (FEV1% pred unless stated, mean and SD) | Location of test | Monitoring                                  |
|---------------------------------|-------------------------|-----------------------------------------|----------------------------|---------------------------------|----------------------------------------------------------|------------------|---------------------------------------------|
| Aguilaniu 2014 <sup>6</sup>     | Semi-paced 3-minute STS | Repeatability                           | 40                         | COPD                            | 54 (16)                                                  | Centre           | SpO <sub>2</sub> , pulse, dyspnoea, fatigue |
| Benton 2009 <sup>7</sup>        | 30secSTS                | XS                                      | 40                         | COPD                            | 36.7(2.6)                                                | Centre           | NS                                          |
| Bernabeu-Mora 2016 <sup>8</sup> | 5STS                    | XS                                      | 137                        | COPD                            | 50.2 (16.5)                                              | Centre           | NS                                          |
| Berry 2018 <sup>9</sup>         | 5STS                    | Pre-post                                | 11                         | COPD                            | 61.1(5.9)                                                | Centre           | NS                                          |
| Bossenbroek 2009 <sup>10</sup>  | 30secSTS                | XS                                      | 15                         | COPD lung transplant candidates | 20(5.2)                                                  | Centre           | NS.                                         |
| Briand 2018 <sup>11</sup>       | 1minSTS                 | Reliability and validity, retrospective | 107                        | iILD                            | DLCO 51 (19)%pred                                        | Centre           | SpO <sub>2</sub> , pulse, dyspnoea, fatigue |
| Butcher 2012 <sup>12</sup>      | 30secSTS                | RXT                                     | 13                         | COPD                            | 48 (14)                                                  | Centre           | NS                                          |
| Chen 2018 <sup>13</sup>         | 5STS                    | RCT                                     | 47                         | COPD                            | 54.70 (24.29)                                            | Centre           | NS                                          |

|                                                |                              |                             |            |      |                           |        |                                             |
|------------------------------------------------|------------------------------|-----------------------------|------------|------|---------------------------|--------|---------------------------------------------|
| Crook 2017a <sup>14</sup>                      | 1minSTS                      | Multi-centre validity study | 255        | COPD | 53 (15)                   | Centre | NS                                          |
| Crook 2017b <sup>15</sup>                      | 1minSTS                      | Prospective Cohort          | 371        | COPD | Median 58 (IQR 44n to 68) | Centre | NS                                          |
| Gloeckl 2012 <sup>16</sup>                     | 5STaS                        | RCT                         | 82         | COPD | 39 (11)                   | Centre | NS                                          |
| Gonzalez-Saiz 2017 <sup>17</sup>               | 5STS                         | RCT                         | 40         | PAH  | Mean PAP 47 (15)mmHg      | Centre | NS                                          |
| Grosbois 2015 <sup>18,19</sup><br>Coquart 2017 | 10STS                        | Retrospective               | 211<br>298 | COPD | 41.5(17.41)               | Home   | SpO <sub>2</sub> , pulse, dyspnoea, fatigue |
| Gruet 2016 <sup>20</sup>                       | 1minSTS                      | Validity and reliability    | 25         | CF   | 59.5 (range 21.8-112.0)   | Centre | SpO <sub>2</sub> , pulse, dyspnoea, fatigue |
| Hansen 2018 <sup>21</sup>                      | 30secSTS                     | Reliability                 | 50         | COPD | 32 (9)                    | Centre | NS                                          |
| Jones 2013 <sup>22</sup>                       | 5STS                         | Pre-post                    | 475        | COPD | 47.6 (SD NS)              | Centre | NS                                          |
| Kongsgaard 2004 <sup>23</sup>                  | 30secSTS                     | RCT                         | 18         | COPD | 46 (3.4)                  | Centre | NS                                          |
| Levesque 2019 <sup>24</sup>                    | 5STS,<br>1minSTS,<br>3minSTS | Multicentre observational   | 116        | COPD | 47.5 (95% CI 44.5 – 50.4) | Centre | SpO <sub>2</sub> , pulse, dyspnoea, fatigue |

|                             |                               |                    |     |                   |                                                           |                 |                                                                                                                 |
|-----------------------------|-------------------------------|--------------------|-----|-------------------|-----------------------------------------------------------|-----------------|-----------------------------------------------------------------------------------------------------------------|
| Li 2018 <sup>25</sup>       | 30secSTS                      | RCT                | 36  | COPD              | Control group:<br>64% GOLD stage II<br>36% GOLD stage III | Centre          | NS                                                                                                              |
| Mancuso 2007 <sup>26</sup>  | 5STS                          | XS                 | 258 | Asthma            | 90 (18)                                                   | Centre          | Dyspnoea, leg exertion                                                                                          |
| Mazzarin 2018 <sup>27</sup> | 1minSTS                       | XS                 | 39  | COPD on LTOT      | Median 29%pred                                            | Home            | NS                                                                                                              |
| Morita 2018 <sup>28</sup>   | 5STS,<br>30secSTS,<br>1minSTS | XS                 | 23  | COPD              | 68 (8)                                                    | Centre          | SpO <sub>2</sub> , pulse,<br>dyspnoea, blood pressure, fatigue                                                  |
| Neves 2018 <sup>29</sup>    | 5STS                          | Controlled trial   | 20  | COPD              | 58.4 (21.4)                                               | Centre          | NS                                                                                                              |
| Oliveira 2018 <sup>30</sup> | 5STS                          | Longitudinal       | 44  | Exacerbation COPD | 51.11 (20.27)                                             | Centre and Home | NS                                                                                                              |
| Ozalevli 2007 <sup>31</sup> | 1minSTS                       | XS                 | 53  | COPD              | 46 (9)                                                    | Centre          | SpO <sub>2</sub> , pulse,<br>dyspnoea, blood pressure, fatigue                                                  |
| Puhan 2013 <sup>32</sup>    | 1minSTS                       | Prospective cohort | 374 | COPD              | 46 (9)                                                    | Primary care    | NS                                                                                                              |
| Radtke 2016 <sup>33</sup>   | 1minSTS                       | Pre-post           | 14  | CF                | Median 53 (43, 56.5)                                      | Centre          | SpO <sub>2</sub> , heart rate (polar),<br>cardiometabolic parameters (Metamax 3B), dyspnoea, perceived exertion |

|                                |          |          |    |      |                       |        |                                                                                                              |
|--------------------------------|----------|----------|----|------|-----------------------|--------|--------------------------------------------------------------------------------------------------------------|
| Radtke 2017 <sup>34</sup>      | 1minSTS  | XS       | 15 | CF   | Median 49 (IQR 34,55) | Centre | SpO <sub>2</sub> , heart rate (polar), cardiometabolic parameters (Metamax 3B), dyspnoea, perceived exertion |
| Regueiro 2009 <sup>35</sup>    | 2minSTS  | XS       | 10 | COPD | 46 (8)                | Centre | SpO <sub>2</sub> , pulse, blood pressure, dyspnoea                                                           |
| Reychler 2018 <sup>36</sup>    | 1minSTS  | RXT      | 42 | COPD | 47 (18)               | Centre | SpO <sub>2</sub> , heart rate (polar), blood pressure, dyspnoea, lower limb fatigue                          |
| Rietschel 2008 <sup>37</sup>   | 5STS     | Pre-post | 10 | CF   | 49 (29)               | Centre | NS                                                                                                           |
| Rosenbek 2015 <sup>38</sup>    | 5STS     | Pre-post | 37 | COPD | 27 (13)               | Home   | NS                                                                                                           |
| Sheppard 2019 <sup>39</sup>    | 30secSTS | XS       | 15 | CF   | 73 (19)               | Centre | NS                                                                                                           |
| Spielmanns 2017 <sup>40</sup>  | 5STS     | RCT      | 27 | COPD | Median 63 (IQR 39-71) | Centre | NS                                                                                                           |
| Vaidya 2016 <sup>41</sup>      | 1minSTS  | Pre-post | 48 | COPD | 52 (16)               | Centre | Dyspnoea, fatigue                                                                                            |
| Vanshelboim 2014 <sup>42</sup> | 30secSTS | RCT      | 32 | IPF  | DLCO 49 (17)          | Centre | NS                                                                                                           |

|                           |                      |     |     |      |         |        |                                          |
|---------------------------|----------------------|-----|-----|------|---------|--------|------------------------------------------|
| Zanini 2015 <sup>43</sup> | 30secSTS<br>1 minSTS | RCT | 60  | COPD | 46 (14) | Centre | SpO <sub>2</sub> , pulse, VAS<br>fatigue |
| Zhang 2018 <sup>44</sup>  | 5STS<br>30secSTS     | XS  | 128 | COPD | 54 (37) | Centre | SpO <sub>2</sub> , pulse, dyspnoea       |

1minSTS – 1 minute sit to stand test, 2minSTS – 2 minute sit to stand test, 3minSTS – 3 minute sit to stand test, 30secSTS – 30 second STS test, 5STS – five times sit to stand test, 95% CI – 95% confidence interval, CF -cystic fibrosis, COPD – chronic obstructive pulmonary disease, FEV1 – forced expiratory volume in 1 second, GOLD – Global Initiative for Chronic Obstructive Lung Disease; ILD – interstitial lung disease, IPF – idiopathic pulmonary fibrosis, IQR – interquartile range, NS – not stated, LTOT – long term oxygen therapy, RCT – randomised controlled trial, RXT – randomised crossover trial, SpO<sub>2</sub> – oxyhaemoglobin saturation, VAS -visual analogue scale, XS – cross-sectional

Table S4. Included studies for step tests

| Study                       | Exercise test | Study design  | Number of participants (n) | Diagnosis | Severity (FEV <sub>1</sub> % pred, mean and SD unless stated) | Location of test | Outcomes reported                             |
|-----------------------------|---------------|---------------|----------------------------|-----------|---------------------------------------------------------------|------------------|-----------------------------------------------|
| Aurora 2001 <sup>45</sup>   | 3MST          | XS            | 28                         | CF        | 34 (SD NS)                                                    | Centre           | SpO <sub>2</sub> , pulse<br>Comparison to 6WT |
| Basso 2010 <sup>46</sup>    | 6MST          | XS            | 19                         | Asthma    | 88 (8)                                                        | Centre           | SpO <sub>2</sub> , pulse, dyspnoea, fatigue   |
| Bonnevie 2017 <sup>47</sup> | 6MStepper     | Retrospective | 24                         | COPD      | Median<br>45%predicted                                        | Centre           | SpO <sub>2</sub> , pulse                      |
| Bonnevie 2019 <sup>48</sup> | 6MStepper     | Retrospective | 69                         | COPD      | Median<br>36%predicted                                        | Centre           | SpO <sub>2</sub> , pulse                      |



|                            |           |                          |    |      |              |        |                                                                               |
|----------------------------|-----------|--------------------------|----|------|--------------|--------|-------------------------------------------------------------------------------|
| Borel 2010 <sup>49</sup>   | 6MStepper | Reliability and validity | 16 | COPD | 54 (21)      | Centre | SpO <sub>2</sub> , heart rate (polar), dyspnoea, fatigue                      |
| Borel 2016 <sup>50</sup>   | 3MST      | RXT                      | 40 | COPD | 55 (15)      | Centre | Gas exchange, Dyspnoea, leg discomfort                                        |
| Chehere 2016 <sup>51</sup> | 6MStepper | XS                       | 31 | ILD  | DLCO 52 (16) | Centre | Gas exchange, SpO <sub>2</sub> , heart rate (polar), dyspnoea, leg discomfort |
| Coquart 2015 <sup>52</sup> | 6MStepper | Pre-post                 | 35 | COPD | 63 (21)      | Centre | SpO <sub>2</sub> , heart rate (polar), dyspnoea, fatigue                      |

|                                  |           |    |    |      |         |                |                                                                     |
|----------------------------------|-----------|----|----|------|---------|----------------|---------------------------------------------------------------------|
| Cox 2013 <sup>53</sup>           | 3MST      | XS | 10 | CF   | 55      | Centre, remote | SpO <sub>2</sub> , pulse,<br>dyspnoea,<br>fatigue                   |
| da Costa 2014 <sup>54</sup>      | 6MStepper | XS | 32 | COPD | 46 (18) | Centre         | SpO <sub>2</sub> , heart rate<br>(polar)                            |
| Dal Corso 2007 <sup>55</sup>     | 6MST      | XS | 31 | ILD  | 77 (18) | Centre         | Gas exchange,<br>ECG, SpO <sub>2</sub> ,<br>dyspnoea, leg<br>effort |
| Dal Corso 2013 <sup>56</sup>     | MIST      | XS | 34 | COPD | 46 (14) | Centre         | Gas exchange,<br>ECG, SpO <sub>2</sub> ,<br>dyspnoea, leg<br>effort |
| De Camargo<br>2011 <sup>57</sup> | Chester   | XS | 32 | COPD | 46 (15) | Centre         | SpO <sub>2</sub> , pulse,<br>dyspnoea,<br>fatigue                   |

|                                                           |                       |               |     |                |                       |        |                                                                      |
|-----------------------------------------------------------|-----------------------|---------------|-----|----------------|-----------------------|--------|----------------------------------------------------------------------|
| De Camargo<br>2013 <sup>58</sup>                          | Chester, MIST         | XS            | 17  | Bronchiectasis | 61 (22)               | Centre | SpO <sub>2</sub> , pulse,<br>blood pressure,<br>dyspnoea,<br>fatigue |
| Delourme 2012                                             | 6minStepper           | Validation    | 84  | ILD            | DLCO 51 (18)<br>%pred | Center | SpO <sub>2</sub> , pulse,<br>dyspnoea,<br>fatigue                    |
| Fabre 2017 <sup>59</sup>                                  | 6MStepper             | Retrospective | 50  | COPD           | 57 (20)               | Centre | SpO <sub>2</sub> , pulse                                             |
| Fox 2013 <sup>60</sup>                                    | Step oximetry<br>test | RXT           | 64  | PAH, CTEPH     | DLCO 69 (22)<br>%pred | Centre | SpO <sub>2</sub> , pulse,<br>dyspnoea                                |
| Grosbois 2015 <sup>18</sup><br>Coquart 2017 <sup>19</sup> | 6MStepper             | Retrospective | 211 | COPD           | 41 (18)               | Home   | SpO <sub>2</sub> , pulse,<br>dyspnoea,<br>fatigue                    |
| Grosbois 2016 <sup>61</sup>                               | 6MStepper             | Retrospective | 91  | COPD           | 55 (19)               | Centre | SpO <sub>2</sub> , pulse                                             |
| Holland 2011 <sup>62</sup>                                | 3MST                  | Prospective   | 101 | CF             | 61 (23)               | Centre | SpO <sub>2</sub> , heart rate<br>(polar),                            |

|                             |               |                                        |    |                                           |                        |        |                                                                    |
|-----------------------------|---------------|----------------------------------------|----|-------------------------------------------|------------------------|--------|--------------------------------------------------------------------|
|                             |               |                                        |    |                                           |                        |        | dyspnoea,<br>fatigue                                               |
| Jose 2016 <sup>63</sup>     | Chester, MIST | XS                                     | 77 | Hospitalised for<br>respiratory<br>reason | Median<br>57%predicted | Centre | SpO <sub>2</sub> , pulse,<br>dyspnoea,<br>fatigue                  |
| Karloh 2013 <sup>64</sup>   | Chester       | XS                                     | 10 | COPD                                      | 32 (12)                | Centre | SpO <sub>2</sub> , pulse,<br>blood pressure,<br>dyspnoea           |
| Marrara 2012 <sup>65</sup>  | 6MStepper     | RCT physical<br>training vs<br>control | 43 | COPD                                      | 49 (15)                | Centre | SpO <sub>2</sub> , heart<br>rate, (polar),<br>dyspnoea,<br>fatigue |
| Mazzarin 2018 <sup>27</sup> | 6MStepper     | XS                                     | 39 | COPD on LTOT                              | Median<br>29%predicted | Home   | NS                                                                 |

|                             |                     |                                     |    |                        |            |        |                                                                          |
|-----------------------------|---------------------|-------------------------------------|----|------------------------|------------|--------|--------------------------------------------------------------------------|
| Murphy 2005 <sup>66</sup>   | 3MST                | RCT home pulmonary rehab vs control | 26 | COPD post exacerbation | 38 (12)    | Centre | SpO <sub>2</sub> , pulse, dyspnoea                                       |
| Narang 2003 <sup>67</sup>   | 3MST                | XS                                  | 19 | CF                     | 75 (SD NS) | Centre | SpO <sub>2</sub> , pulse                                                 |
| Perrault 2009 <sup>68</sup> | 3MST at 4 rates     | XS                                  | 43 | COPD                   | 49 (16)    | Centre | Gas exchange, ECG, SpO <sub>2</sub> , dyspnoea                           |
| Pessoa 2014 <sup>69</sup>   | 3MST – free cadence | XS                                  | 32 | COPD                   | 46 (18)    | Centre | SpO <sub>2</sub> , heart rate (polar), blood pressure, dyspnoea, fatigue |
| Pichon 2016 <sup>70</sup>   | 6MStepper           | Pre-post                            | 62 | COPD                   | 46 (16)    | Centre | SpO <sub>2</sub> , pulse, dyspnoea, fatigue                              |

|                                |                                                   |                             |    |        |               |        |                                          |
|--------------------------------|---------------------------------------------------|-----------------------------|----|--------|---------------|--------|------------------------------------------|
| Rammaert<br>2011 <sup>71</sup> | 6MStepper                                         | Pre-post                    | 17 | IPF    | DLCO 7.8(4.0) | Centre | NS                                       |
| Rusanov 2008 <sup>72</sup>     | 15-steps<br>climbing<br>exercise<br>oximetry test | XS                          | 51 | IPF    | DLCO 36 (14)  | Centre | SpO <sub>2</sub> , pulse                 |
| Shitrit 2009 <sup>73</sup>     | 15-steps<br>climbing<br>exercise<br>oximetry test | Prospective<br>longitudinal | 51 | IPF    | DLCO 36 (14)  | Centre | SpO <sub>2</sub> , pulse                 |
| Starobin 2006 <sup>74</sup>    | 15-steps<br>climbing<br>exercise<br>oximetry test | XS                          | 50 | COPD   | 43 (20)       | Centre | SpO <sub>2</sub> , pulse                 |
| Tancredi 2004 <sup>75</sup>    | 3MST                                              | XS                          | 43 | Asthma | NS            | Centre | ECG, SpO <sub>2</sub> , FEV <sub>1</sub> |

3MST – 3-minute step test, 6MST – 6-minute step test at free cadence, 6minStepper – 6-minute step test on hydraulic stepper equipment, CF -cystic fibrosis, COPD – chronic obstructive pulmonary disease, CTEPH – chronic thromboembolic pulmonary hypertension, DLCO – diffusing capacity for carbon monoxide, ECG – electro-cardiogram, FEV<sub>1</sub> – forced expiratory volume in 1 second, GOLD – Global Initiative for Chronic Obstructive Lung Disease; LTOT-

long term oxygen therapy, ILD – interstitial lung disease, IPF – idiopathic pulmonary fibrosis, MIST – modified incremental step test, NS- not stated, PAH – pulmonary arterial hypertension, RCT – randomised controlled trial, RXT – randomised crossover trial, SpO<sub>2</sub> – oxyhaemoglobin saturation, VAS -visual analogue scale

Table S5. Included studies for Timed up and Go

| Study                                                     | Exercise test | Study design | Number of participants (n) | Diagnosis | Severity (eg FEV1% pred, mean and SD) | Location of test | Monitoring                                  |
|-----------------------------------------------------------|---------------|--------------|----------------------------|-----------|---------------------------------------|------------------|---------------------------------------------|
| Al Haddad 2016 <sup>76</sup>                              | TUG           | XS           | 119                        | COPD      | 59 (18)                               | Centre           | NS                                          |
| Albarrati 2016 <sup>77</sup>                              | TUG           | XS           | 520                        | COPD      | 58 (19)                               | Centre           | NS                                          |
| Beauchamp 2009 <sup>78</sup>                              | TUG           | XS           | 39                         | COPD      | 42 (17)                               | Centre           | NS                                          |
| Benton 2009 <sup>7</sup>                                  | TUG           | XS           | 40                         | COPD      | 37 (3)                                | Centre           | NS                                          |
| Butcher 2004 <sup>79</sup>                                | TUG           | XS           | 30                         | COPD      | 46 (4)                                | Centre           | NS                                          |
| Butcher 2012 <sup>12</sup>                                | TUG           | XS           | 13                         | COPD      | 48 (14)                               | Centre           | NS                                          |
| Grosbois 2015 <sup>18</sup><br>Coquart 2017 <sup>19</sup> | TUG           | Pre-post     | 211                        | COPD      | 42 (18)                               | Home             | SpO <sub>2</sub> , pulse, dyspnoea, fatigue |
| Marques 2016 <sup>80</sup>                                | TUG           | XS           | 60                         | COPD      | 65 (23)                               | Centre           | NS                                          |



|                                    |     |                  |     |              |                            |        |    |
|------------------------------------|-----|------------------|-----|--------------|----------------------------|--------|----|
| Mazzarin 2018 <sup>27</sup>        | TUG | XS               | 39  | COPD on LTOT | Median<br>29%predicted     | Home   | NS |
| Mekki 2019 <sup>81</sup>           | TUG | RCT              | 45  | COPD         | 58 (14)                    | Centre | NS |
| Mesquita 2013 <sup>82</sup>        | TUG | XS               | 95  | COPD         | Median<br>33%predicted     | Centre | NS |
| Mesquita 2016 <sup>83</sup>        | TUG | Pre-post         | 500 | COPD         | Median<br>46%predicted     | Centre | NS |
| Neves 2018 <sup>29</sup>           | TUG | Controlled trial | 20  | COPD         | 58 (21)                    | Centre | NS |
| Rosenbek 2015 <sup>38</sup>        | TUG | Pre-post         | 37  | COPD         | 27 (13)                    | Home   | NS |
| Vainshelboim<br>2019 <sup>84</sup> | TUG | Observational    | 34  | IPF          | DLCO 50 (15)<br>%predicted | Centre | NS |
| Wilke 2015 <sup>85</sup>           | TUG | Observational    | 85  | COPD         | 34 (14)                    | Home   | NS |

CF – cystic fibrosis, COPD – chronic obstructive pulmonary disease, FEV<sub>1</sub> – forced expiratory volume in 1 second, GOLD – Global Initiative for Chronic Obstructive Lung Disease; IPF – idiopathic pulmonary fibrosis, LTOT – long term oxygen therapy, NS – not stated, RCT – randomised controlled trial, RXT – randomised crossover trial, SpO<sub>2</sub> – oxyhaemoglobin saturation, TUG – timed up and go, VAS -visual analogue scale

## References

1. Brooks D, Solway S, Weinacht K, Wang D, Thomas S. Comparison between an indoor and an outdoor 6-minute walk test among individuals with chronic obstructive pulmonary disease. *Arch Phys Med Rehab*. 2003;84(6):873-876.
2. Holland AE, Rasekaba T, Fiore JF, Jr., Burge AT, Lee AL. The 6-minute walk distance cannot be accurately assessed at home in people with COPD. *Disabil Rehab*. 2015;37(12):1102-1106.
3. Juen J, Cheng Q, Prieto-Centurion V, Krishnan JA, Schatz B. Health monitors for chronic disease by gait analysis with mobile phones. *Telemed J E Health*. 2014;20(11):1035-1041.
4. Juen J, Cheng Q, Schatz B. A natural walking monitor for pulmonary patients using mobile phones. *IEEE J Biomed Health Inform* 2015;19(4):1399-1405.
5. Zainuldin R, Mackey MG, Alison JA. Prescription of walking exercise intensity from the 6-minute walk test in people with chronic obstructive pulmonary disease. *J Cardiopulm Rehabil Prev*. 2015;35(1):65-69.
6. Aguilaniu B, Roth H, Gonzalez-Bermejo J, et al. A simple semipaced 3-minute chair rise test for routine exercise tolerance testing in COPD. *Int J COPD*. 2014;9:1009-1019.
7. Benton MJ, Alexander JL. Validation of functional fitness tests as surrogates for strength measurement in frail, older adults with chronic obstructive pulmonary disease. *Am J Phys Med Rehab*. 2009;88(7):579-583; quiz 584-576, 590.
8. Bernabeu-Mora R, Medina-Mirapeix F, Llamazares-Herran E, Oliveira-Sousa SLd, Sanchez-Martinez MP, Escolar-Reina P. The accuracy with which the 5 times sit-to-stand test, versus gait speed, can identify poor exercise tolerance in patients with COPD: A cross-sectional study. *Medicine*. 2016;95(35):e4740.
9. Berry MJ, Sheilds KL, Adair NE. Comparison of Effects of Endurance and Strength Training Programs in Patients with COPD. *COPD*. 2018;15(2):192-199.
10. Bossenbroek L, ten Hacken NHT, van der Bij W, Verschuuren EAM, Koeter GH, de Greef MHG. Cross-sectional assessment of daily physical activity in chronic obstructive pulmonary disease lung transplant patients. *J Heart Lung Transplantation*. 2009;28(2):149-155.
11. Briand J, Behal H, Chenivresse C, Wemeau-Stervinou L, Wallaert B. The 1-minute sit-to-stand test to detect exercise-induced oxygen desaturation in patients with interstitial lung disease. *Ther Adv Respir Dis* 2018;12:1753466618793028.
12. Butcher SJ, Pikaluk BJ, Chura RL, Walkner MJ, Farthing JP, Marciniuk DD. Associations between isokinetic muscle strength, high-level functional performance, and physiological parameters in patients with chronic obstructive pulmonary disease. *Int J COPD*. 2012;7:537-542.
13. Chen Y, Niu Me, Zhang X, Qian H, Xie A, Wang X. Effects of home-based lower limb resistance training on muscle strength and functional status in stable Chronic obstructive pulmonary disease patients. *J Clin Nursing*. 2018;27(5-6):e1022-e1037.
14. Crook S, Busching G, Schultz K, et al. A multicentre validation of the 1-min sit-to-stand test in patients with COPD. *Eur Respir J*. 2017;49(3).
15. Crook S, Frei A, Ter Riet G, Puhan MA. Prediction of long-term clinical outcomes using simple functional exercise performance tests in patients with COPD: a 5-year prospective cohort study. *Respir Res*. 2017;18(1):112.
16. Gloeckl R, Heinzelmann I, Baeuerle S, et al. Effects of whole body vibration in patients with chronic obstructive pulmonary disease--a randomized controlled trial. *Respir Med*. 2012;106(1):75-83.
17. Gonzalez-Saiz L, Fiuza-Luces C, Sanchis-Gomar F, et al. Benefits of skeletal-muscle exercise training in pulmonary arterial hypertension: The WHOLEi+12 trial. *Int J Cardiology*.

18. Grosbois JM, Gicquello A, Langlois C, et al. Long-term evaluation of home-based pulmonary rehabilitation in patients with COPD. *Int J COPD*. 2015;10:2037-2044.
19. Coquart JB, Le Rouzic O, Racil G, Wallaert B, Grosbois J-M. Real-life feasibility and effectiveness of home-based pulmonary rehabilitation in chronic obstructive pulmonary disease requiring medical equipment. *Int J COPD*. 2017;12:3549-3556.
20. Gruet M, Peyre-Tartaruga LA, Mely L, Vallier J-M. The 1-Minute Sit-to-Stand Test in Adults With Cystic Fibrosis: Correlations With Cardiopulmonary Exercise Test, 6-Minute Walk Test, and Quadriceps Strength. *Respir Care*. 2016;61(12):1620-1628.
21. Hansen H, Beyer N, Frolich A, Godtfredsen N, Bieler T. Intra- and inter-rater reproducibility of the 6-minute walk test and the 30-second sit-to-stand test in patients with severe and very severe COPD. *Int J COPD*. 2018;13:3447-3457.
22. Jones SE, Kon SSC, Canavan JL, et al. The five-repetition sit-to-stand test as a functional outcome measure in COPD. *Thorax*. 2013;68(11):1015-1020.
23. Kongsgaard M, Backer V, Jorgensen K, Kjaer M, Beyer N. Heavy resistance training increases muscle size, strength and physical function in elderly male COPD-patients--a pilot study. *Respir Med*. 2004;98(10):1000-1007.
24. Levesque J, Antoniadis A, Li PZ, et al. Minimal clinically important difference of 3-minute chair rise test and the DIRECT questionnaire after pulmonary rehabilitation in COPD patients. *Int J COPD*. 2019;14:261-269.
25. Li P, Liu J, Lu Y, Liu X, Wang Z, Wu W. Effects of long-term home-based Liuzijue exercise combined with clinical guidance in elderly patients with chronic obstructive pulmonary disease. *Clin Int Ageing*. 2018;13:1391-1399.
26. Mancuso CA, Choi TN, Westermann H, Briggs WM, Wenderoth S, Charlson ME. Measuring physical activity in asthma patients: two-minute walk test, repeated chair rise test, and self-reported energy expenditure. *J Asthma*. 2007;44(4):333-340.
27. Mazzarin C, Kovelis D, Biazim S, Pitta F, Valderramas S. Physical Inactivity, Functional Status and Exercise Capacity in COPD Patients Receiving Home-Based Oxygen Therapy. *COPD*. 2018;15(3):271-276.
28. Morita AA, Bisca GW, Machado FVC, Hernandez NA, Pitta F, Probst VS. Best Protocol for the Sit-to-Stand Test in Subjects With COPD. *Respir Care*. 2018;63(8):1040-1049.
29. Neves CDC, Lacerda ACR, Lage VKS, et al. Whole body vibration training increases physical measures and quality of life without altering inflammatory-oxidative biomarkers in patients with moderate COPD. *J App Physiol*. 2018;125(2):520-528.
30. Oliveira A, Afreixo V, Marques A. Enhancing our understanding of the time course of acute exacerbations of COPD managed on an outpatient basis. *Int J COPD*. 2018;13:3759-3766.
31. Ozalevli S, Ozden A, Itil O, Akkoclu A. Comparison of the Sit-to-Stand Test with 6 min walk test in patients with chronic obstructive pulmonary disease. *Respir Med*. 2007;101(2):286-293.
32. Puhan MA, Siebeling L, Zoller M, Muggensturm P, ter Riet G. Simple functional performance tests and mortality in COPD. *Eur Respir J*. 2013;42(4):956-963.
33. Radtke T, Puhan MA, Hebestreit H, Kriemler S. The 1-min sit-to-stand test--A simple functional capacity test in cystic fibrosis? *J Cystic Fibrosis*. 2016;15(2):223-226.
34. Radtke T, Hebestreit H, Puhan MA, Kriemler S. The 1-min sit-to-stand test in cystic fibrosis - Insights into cardiorespiratory responses. *J Cystic Fibrosis*. 2017;16(6):744-751.
35. Regueiro EM, Di Lorenzo VA, Basso RP, Pessoa BV, Jamami M, Costa D. Relationship of BODE Index to functional tests in chronic obstructive pulmonary disease. *Clinics (Sao Paulo)*. 2009;64(10):983-988.
36. Reyhler G, Boucard E, Peran L, et al. One minute sit-to-stand test is an alternative to 6MWT to measure functional exercise performance in COPD patients. *Clin Respir J*. 2018;12(3):1247-1256.

37. Rietschel E, van Koningsbruggen S, Fricke O, Semler O, Schoenau E. Whole body vibration: a new therapeutic approach to improve muscle function in cystic fibrosis? *Int J Rehabil Res.* 2008;31(3):253-256.
38. Rosenbek Minet L, Hansen LW, Pedersen CD, et al. Early telemedicine training and counselling after hospitalization in patients with severe chronic obstructive pulmonary disease: a feasibility study. *BMC Med Inform Decision Making* 2015;15:3.
39. Sheppard E, Chang K, Cotton J, et al. Functional Tests of Leg Muscle Strength and Power in Adults With Cystic Fibrosis. *Respir Care.* 2019;64(1):40-47.
40. Spielmanns M, Boeselt T, Gloeckl R, et al. Low-Volume Whole-Body Vibration Training Improves Exercise Capacity in Subjects With Mild to Severe COPD. *Respir Care.* 2017;62(3):315-323.
41. Vaidya T, de Bisschop C, Beaumont M, et al. Is the 1-minute sit-to-stand test a good tool for the evaluation of the impact of pulmonary rehabilitation? Determination of the minimal important difference in COPD. *Int J COPD.* 2016;11:2609-2616.
42. Vainshelboim B, Oliveira J, Yehoshua L, et al. Exercise training-based pulmonary rehabilitation program is clinically beneficial for idiopathic pulmonary fibrosis. *Respiration.* 2014;88(5):378-388.
43. Zanini A, Aiello M, Cherubino F, et al. The one repetition maximum test and the sit-to-stand test in the assessment of a specific pulmonary rehabilitation program on peripheral muscle strength in COPD patients. *Int J COPD.* 2015;10:2423-2430.
44. Zhang Q, Li Y-X, Li X-L, et al. A comparative study of the five-repetition sit-to-stand test and the 30-second sit-to-stand test to assess exercise tolerance in COPD patients. *Int J COPD.* 2018;13:2833-2839.
45. Aurora P, Prasad SA, Balfour-Lynn IM, Slade G, Whitehead B, Dinwiddie R. Exercise tolerance in children with cystic fibrosis undergoing lung transplantation assessment. *Euro Respir J.* 2001;18(2):293-297.
46. Basso RP, Jamami M, Pessoa BV, Labadessa IG, Regueiro EMG, Di Lorenzo VAP. Assessment of exercise capacity among asthmatic and healthy adolescents. *Revista brasileira de fisioterapia.* 2010;14(3):252-258.
47. Bonnevie T, Gravier F-E, Leboullenger M, et al. Six-minute Stepper Test to Set Pulmonary Rehabilitation Intensity in Patients with COPD - A Retrospective Study. *COPD.* 2017;14(3):293-297.
48. Bonnevie T, Allingham M, Prieur G, et al. The six-minute stepper test is related to muscle strength but cannot substitute for the one repetition maximum to prescribe strength training in patients with COPD. *Int J COPD.* 2019;14:767-774.
49. Borel B, Fabre C, Saison S, Bart F, Grosbois J-M. An original field evaluation test for chronic obstructive pulmonary disease population: the six-minute stepper test. *Clin Rehab.* 2010;24(1):82-93.
50. Borel B, Wilkinson-Maitland CA, Hamilton A, et al. Three-minute constant rate step test for detecting exertional dyspnea relief after bronchodilation in COPD. *Int J COPD.* 2016;11:2991-3000.
51. Chehere B, Bougault V, Gicquello A, Wallaert B. Cardiorespiratory Response to Different Exercise Tests in Interstitial Lung Disease. *Med Sci Sports Ex.* 2016;48(12):2345-2352.
52. Coquart JB, Lemaitre F, Castres I, Saison S, Bart F, Grosbois J-M. Reproducibility and Sensitivity of the 6-Minute Stepper Test in Patients with COPD. *COPD.* 2015;12(5):533-538.
53. Cox NS, Alison JA, Button BM, Wilson JW, Holland AE. Assessing exercise capacity using telehealth: a feasibility study in adults with cystic fibrosis. *Respir Care.* 2013;58(2):286-290.
54. da Costa JN, Arcuri JF, Goncalves IL, et al. Reproducibility of cadence-free 6-minute step test in subjects with COPD. *Respir Care.* 2014;59(4):538-542.
55. Dal Corso S, Duarte SR, Neder JA, et al. A step test to assess exercise-related oxygen desaturation in interstitial lung disease. *Eur Respir J.* 2007;29(2):330-336.

56. Dal Corso S, de Camargo AA, Izbicki M, Malaguti C, Nery LE. A symptom-limited incremental step test determines maximum physiological responses in patients with chronic obstructive pulmonary disease. *Respir Med* 2013;107(12):1993-1999.
57. de Camargo AA, Justino T, de Andrade CHS, Malaguti C, Dal Corso S. Chester step test in patients with COPD: reliability and correlation with pulmonary function test results. *Respir Care* 2011;56(7):995-1001.
58. Camargo AA, Lanza FC, Tupinamba T, Corso SD. Reproducibility of step tests in patients with bronchiectasis. *Braz J Physical Therapy*. 2013;17(3):255-262.
59. Fabre C, Chehere B, Bart F, Mucci P, Wallaert B, Grosbois JM. Relationships between heart rate target determined in different exercise testing in COPD patients to prescribed with individualized exercise training. *Int J COPD*. 2017;12:1483-1489.
60. Fox BD, Langleben D, Hirsch A, Boutet K, Shimony A. Step climbing capacity in patients with pulmonary hypertension. *Clin Res Cardiology*. 2013;102(1):51-61.
61. Grosbois JM, Riquier C, Chehere B, et al. Six-minute stepper test: a valid clinical exercise tolerance test for COPD patients. *Int J COPD*. 2016;11:657-663.
62. Holland AE, Rasekaba T, Wilson JW, Button BM. Desaturation during the 3-minute step test predicts impaired 12-month outcomes in adult patients with cystic fibrosis. *Respir Care*. 2011;56(8):1137-1142.
63. Jose A, Dal Corso S. Step Tests Are Safe for Assessing Functional Capacity in Patients Hospitalized With Acute Lung Diseases. *J Cardiopulm Rehab Prev*. 2016;36(1):56-61.
64. Karloh M, Correa KS, Martins LQ, Araujo CLP, Matte DL, Mayer AF. Chester step test: assessment of functional capacity and magnitude of cardiorespiratory response in patients with COPD and healthy subjects. *Braz J Physical Therapy*. 2013;17(3):227-235.
65. Marrara KT, Marino DM, Jamami M, Oliveira Junior ADd, Di Lorenzo VAP. Responsiveness of the six-minute step test to a physical training program in patients with COPD. *Jornal brasileiro de pneumologia*. 2012;38(5):579-587.
66. Murphy N, Bell C, Costello RW. Extending a home from hospital care programme for COPD exacerbations to include pulmonary rehabilitation. *Respir Med*. 2005;99(10):1297-1302.
67. Narang I, Pike S, Rosenthal M, Balfour-Lynn IM, Bush A. Three-minute step test to assess exercise capacity in children with cystic fibrosis with mild lung disease. *Pediatric Pulmonology*. 2003;35(2):108-113.
68. Perrault H, Baril J, Henophy S, Rycroft A, Bourbeau J, Maltais F. Paced-walk and step tests to assess exertional dyspnea in COPD. *COPD*. 2009;6(5):330-339.
69. Pessoa BV, Arcuri JF, Labadessa IG, Costa JNF, Sentanin AC, Di Lorenzo VAP. Validity of the six-minute step test of free cadence in patients with chronic obstructive pulmonary disease. *Braz J Physical Therapy*. 2014;18(3):228-236.
70. Pichon R, Couturaud F, Mialon P, et al. Responsiveness and Minimally Important Difference of the 6-Minute Stepper Test in Patients with Chronic Obstructive Pulmonary Disease. *Respiration*. 2016;91(5):367-373.
71. Rammaert B, Leroy S, Cavestri B, Wallaert B, Grosbois JM. Home-based pulmonary rehabilitation in idiopathic pulmonary fibrosis. *Revue des maladies respiratoires*. 2011;28(7):e52-57.
72. Rusanov V, Shitrit D, Fox B, Amital A, Peled N, Kramer MR. Use of the 15-steps climbing exercise oximetry test in patients with idiopathic pulmonary fibrosis. *Respir Med*. 2008;102(7):1080-1088.
73. Shitrit D, Rusanov V, Peled N, Amital A, Fuks L, Kramer MR. The 15-step oximetry test: a reliable tool to identify candidates for lung transplantation among patients with idiopathic pulmonary fibrosis. *J Heart Lung Transplantation*. 2009;28(4):328-333.
74. Starobin D, Kramer MR, Yarmolovsky A, et al. Assessment of functional capacity in patients with chronic obstructive pulmonary disease: correlation between cardiopulmonary exercise, 6 minute walk and 15 step exercise oximetry test. *Isr Med Assoc J*. 2006;8(7):460-463.

75. Tancredi G, Quattrucci S, Scalercio F, et al. 3-min step test and treadmill exercise for evaluating exercise-induced asthma. *Eur Respir J*. 2004;23(4):569-574.
76. Al Haddad MA, John M, Hussain S, Bolton CE. Role of the Timed Up and Go Test in Patients With Chronic Obstructive Pulmonary Disease. *J Cardiopulm Rehab Prev*. 2016;36(1):49-55.
77. Albarrati AM, Gale NS, Enright S, Munnery MM, Cockcroft JR, Shale DJ. A simple and rapid test of physical performance in chronic obstructive pulmonary disease. *Int J COPD*. 2016;11:1785-1791.
78. Beauchamp MK, Hill K, Goldstein RS, Janaudis-Ferreira T, Brooks D. Impairments in balance discriminate fallers from non-fallers in COPD. *Respir Med*. 2009;103(12):1885-1891.
79. Butcher SJ, Meshke JM, Sheppard MS. Reductions in functional balance, coordination, and mobility measures among patients with stable chronic obstructive pulmonary disease. *J Cardiopulm Rehab*. 2004;24(4):274-280.
80. Marques A, Cruz J, Quina S, Regencio M, Jacome C. Reliability, Agreement and Minimal Detectable Change of the Timed Up & Go and the 10-Meter Walk Tests in Older Patients with COPD. *COPD*. 2016;13(3):279-287.
81. Mekki M, Paillard T, Sahli S, Tabka Z, Trabelsi Y. Effect of adding neuromuscular electrical stimulation training to pulmonary rehabilitation in patients with chronic obstructive pulmonary disease: randomized clinical trial. *Clin Rehab*. 2019;33(2):195-206.
82. Mesquita R, Janssen DJ, Wouters EF, Schols JM, Pitta F, Spruit MA. Within-day test-retest reliability of the Timed Up & Go test in patients with advanced chronic organ failure. *Arch Phys Med Rehabil*. 2013;94(11):2131-2138.
83. Mesquita R, Wilke S, Smid DE, et al. Measurement properties of the Timed Up & Go test in patients with COPD. *Chron Respir Dis*. 2016;13(4):344-352.
84. Vainshelboim B, Kramer MR, Myers J, Unterman A, Izhakian S, Oliveira J. 8-Foot-Up-and-Go Test is Associated with Hospitalizations and Mortality in Idiopathic Pulmonary Fibrosis: A Prospective Pilot Study. *Lung*. 2019;197(1):81-88.
85. Wilke S, Spruit MA, Wouters EF, Schols JM, Franssen FM, Janssen DJ. Determinants of 1-year changes in disease-specific health status in patients with advanced chronic obstructive pulmonary disease: A 1-year observational study. *Int J Nurs Pract*. 2015;21(3):239-248.
